# Supplementary material
Source: PubMed Central journal article supplement (PMC99115)
Supplement: nar_30_1_349__3.pdf [file nar_30_1_349__3.pdf]

Figure 1. Flow Chart representing analysis of signal transduction proteins in Sentra

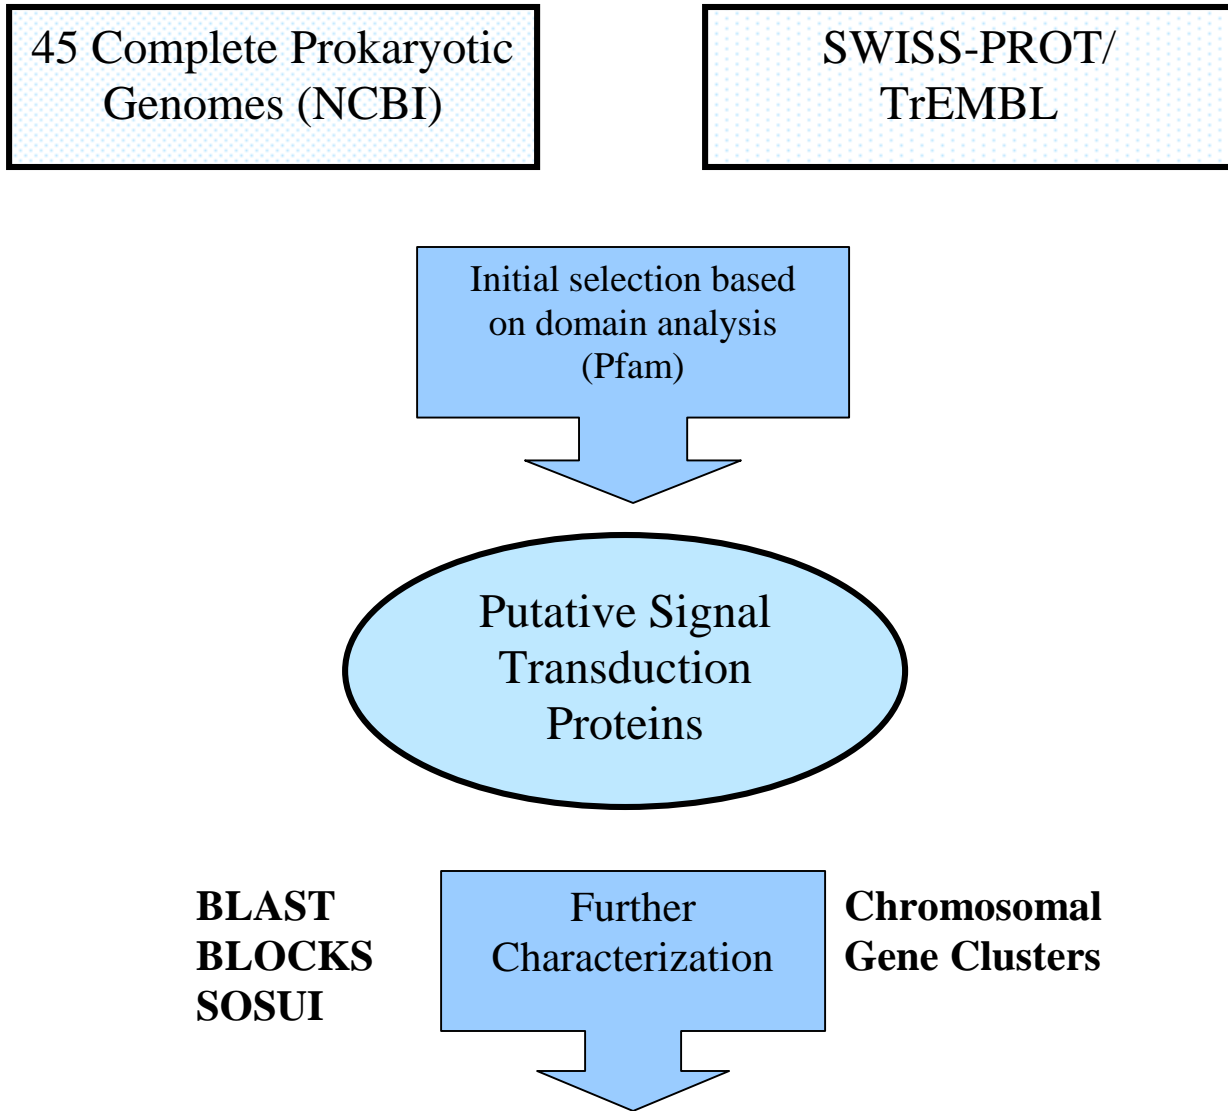

- ★ Refined Signal Transduction Protein Functional Assignment
- ★ Conjectures about the Nature of the Signal and Mechanisms of its Transmission
